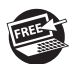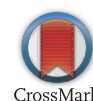

RESPONSE TO COMMENT ON SCHWARTZ ET AL.

# The Time Is Right for a New Classification System for Diabetes: Rationale and Implications of the $\beta$ -Cell-Centric Classification Schema. Diabetes Care 2016;39:179–186

Diabetes Care 2016;39:e129–e130 | DOI: 10.2337/dci16-0011

We thank Drs. Kalra and Baruah for their comments (1) on our article (2) in an effort improve the utility of our proposed  $\beta$ -cell-centric classification.

We agree that “treatment” is more important than “classification.” We find it frustrating that governments and insurers often think otherwise, limiting therapies of choice on the basis of labels of diabetes mellitus (DM) that are not optimally useful. Thus a “precision medicine” classification system that identifies specific causes of hyperglycemia and their corresponding therapies augurs for payment coverage parity across the range of glucose-lowering medications for patients with any form of DM.

Although the insulin-to-glucagon ratio (IGR) construct is interesting and could serve as a “marker” to help choose between various therapies in our approach, our construct is broader. It allows for the realization that a given individual may have other mechanisms of  $\beta$ -cell dysfunction (e.g., inflammation/immune dysfunction, environmental causes). This allows for wider consideration of therapies for any individual patient compared with using an IGR approach.

We acknowledge in the text that additional mechanisms of hyperglycemia will likely be identified. A benefit of the

“Egregious Eleven” organizing principle is that it can readily accommodate new mediating pathways of hyperglycemia as they emerge.

We respectfully disagree that noninsulin therapy is illogical or categorically unsafe in type 1 DM. The ideal treatment paradigm would be one that uses the least number of agents possible to target the greatest number of mediating pathways of hyperglycemia operative in the given patient. It is prudent, we believe, to address insulin resistance and other mechanisms of hyperglycemia that may exist in these insulin-deficient patients. Moreover, use of noninsulin therapies in the management of type 1 DM is supported by several recent discussions, e.g., the study by Bode and Garg (3).

In the patient with type 2 DM, there are no precise markers of residual  $\beta$ -cell mass, and a low IGR may reflect abnormal  $\beta$ -cell function rather than inadequate mass. We feel justified in preferring noninsulin therapies that have the potential of preserving  $\beta$ -cell function versus the use of exogenous insulin therapy in the non-ketotic-prone patient. Exogenous insulin with its requisite hyperinsulinism results in increased weight with hypertriglyceridemia and cytokines, which are believed to reduce  $\beta$ -cell function, induce

Stanley S. Schwartz,<sup>1</sup>  
Solomon Epstein,<sup>2</sup> Barbara E. Corkey,<sup>3</sup>  
Struan F.A. Grant,<sup>4</sup> James R. Gavin III,<sup>5</sup>  
and Richard B. Aguilar<sup>6</sup>

other comorbidities (4), and pose undue hypoglycemic risks (5).

As the authors note, we purposely kept sulfonylureas off our list of therapeutic agents. Multiple studies show sulfonylureas have marked reduction in efficacy after 1 year, possibly related to apoptosis (6). Moreover, real-world studies, e.g., the study by Pantalone et al. (7), show marked increased adverse events. It seems altogether possible that this class would not pass current U.S. Food and Drug Administration or European Medicines Agency requirements for cardiovascular safety.

We look forward to further opportunities to discuss our approach in order to arrive at a consensus that provides the best care to all patients with diabetes.

**Acknowledgments.** The authors acknowledge Mary E. Herman, Montclair State University, NJ, for her editorial assistance in the crafting of the manuscript.

**Duality of Interest.** S.S.S. is a speaker and advisor to Novo Nordisk, Merck, Takeda, Johnson & Johnson, AstraZeneca/Bristol-Myers Squibb, Eli Lilly and Co., and Boehringer Ingelheim/Eli Lilly and Co. and is a speaker for Eisai and GlaxoSmithKline. J.R.G. has received consultant fees from Abbott Diabetes Care, Intarcia Pharmaceuticals, AstraZeneca, and Novo Nordisk; has served on the advisory boards of Janssen

<sup>1</sup>Main Line Health System, Wynnewood, PA, and University of Pennsylvania, Philadelphia, PA

<sup>2</sup>Division of Endocrinology, Diabetes and Bone Disease, Department of Medicine, Mount Sinai Hospital, New York, NY

<sup>3</sup>Department of Medicine, Boston University School of Medicine, Boston, MA

<sup>4</sup>Division of Human Genetics and Center for Applied Genomics, Department of Pediatrics, Perelman School of Medicine, University of Pennsylvania, Philadelphia, PA

<sup>5</sup>Emory University School of Medicine, Atlanta, GA

<sup>6</sup>Diabetes Nation, Sisters, OR

Corresponding author: Stanley S. Schwartz, stschar@gmail.com.

© 2016 by the American Diabetes Association. Readers may use this article as long as the work is properly cited, the use is educational and not for profit, and the work is not altered.

Pharmaceuticals and AstraZeneca; and has served on the speakers' bureaus of AstraZeneca, Janssen, and Boehringer Ingelheim/Eli Lilly and Co. R.B.A. sits on the advisory board and speakers' bureaus of Eli Lilly and Co., Boehringer Ingelheim, Janssen, and Takeda. No other potential conflicts of interest relevant to this article were reported.

## References

1. Kalra S, Baruah MP. Comment on Schwartz et al. The time is right for a new classification system for diabetes: rationale and implications of the  $\beta$ -cell-centric classification schema. *Diabetes Care* 2016;39:179–186 (Letter). *Diabetes Care* 2016;39:e128. DOI: 10.2337/dc16-0162
2. Schwartz SS, Epstein S, Corkey BE, Grant SFA, Gavin JR 3rd, Aguilar RB. The time is right for a new classification system for diabetes: rationale and implications of the  $\beta$ -cell-centric classification schema. *Diabetes Care* 2016;39:179–186
3. Bode BW, Garg SK. The emerging role of adjunctive noninsulin antihyperglycemic therapy in the management of type 1 diabetes. *Endocr Pract* 2016;22:220–230
4. Holden SE, Currie CJ. Endogenous hyperinsulinaemia and exogenous insulin: a common theme between atherosclerosis, increased cancer risk and other morbidities. *Atherosclerosis* 2012;222:26–28
5. Chico A, Vidal-Ríos P, Subirà M, Novials A. The continuous glucose monitoring system is useful for detecting unrecognized hypoglycemia in patients with type 1 and type 2 diabetes but is not better than frequent capillary glucose measurements for improving metabolic control. *Diabetes Care* 2003;26:1153–1157
6. Maedler K, Carr RD, Bosco D, Zuellig RA, Berney T, Donath MY. Sulfonylurea induced beta-cell apoptosis in cultured human islets. *J Clin Endocrinol Metab* 2005;90:501–506
7. Pantalone KM, Kattan MW, Yu C, et al. Increase in overall mortality risk in patients with type 2 diabetes receiving glipizide, glyburide or glimepiride monotherapy versus metformin: a retrospective analysis. *Diabetes Obes Metab* 2012;14:803–809
